# Supplementary material for: Down-regulation of miR-223 reverses epithelial-mesenchymal transition in gemcitabine-resistant pancreatic cancer cells
Source: PubMed Central journal article supplement (PMC4359328; doi:10.18632/oncotarget.2714), 2015-02-02
Supplement: oncotarget-06-1740-s001.pdf [file oncotarget-06-1740-s001.pdf]

## SUPPLEMENTARY FIGURE

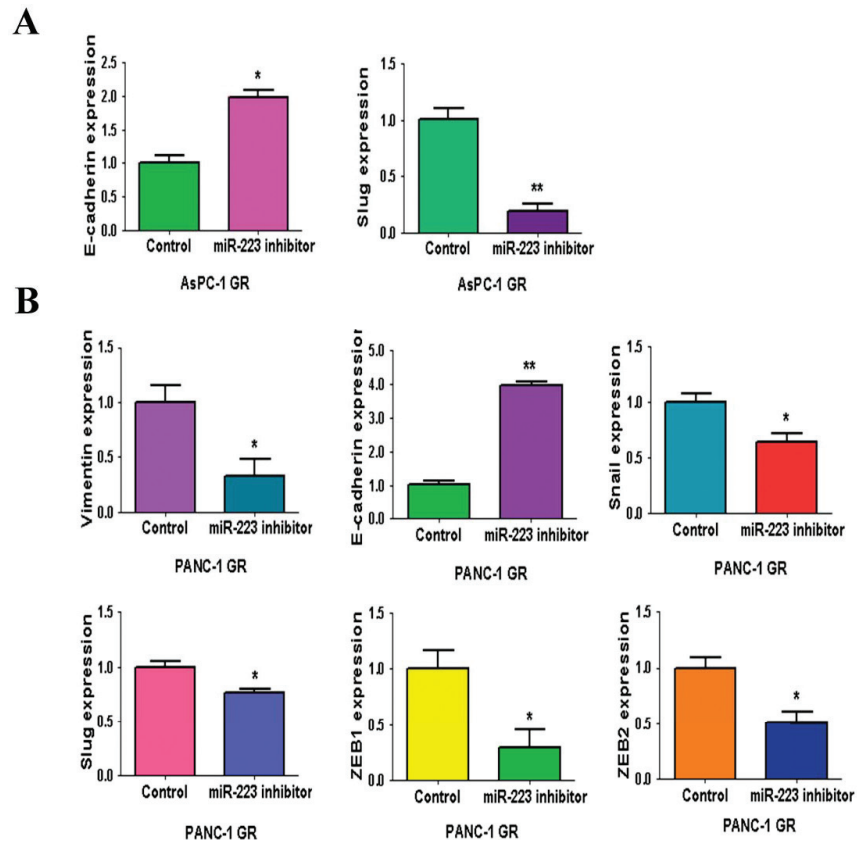

**Supplementary Figure 1:** Western blotting analysis was performed to detect the expression of EMT markers in AsPC-1 GR and PANC-1 GR cells after miR-223 inhibitor treatment in Figure 4D. Quantitative results are illustrated for cells treated with miR-223 inhibitor in AsPC-1 GR (A) and PANC-1 GR (B). \* $P < 0.05$  vs control; \*\* $P < 0.01$  vs control.
